# Supplementary material
Source: publisher figshare collection journal article supplement (https://gsajournals.figshare.com/articles/dataset/_/12616691)
Supplement: Supplementary file 3 [file 1]

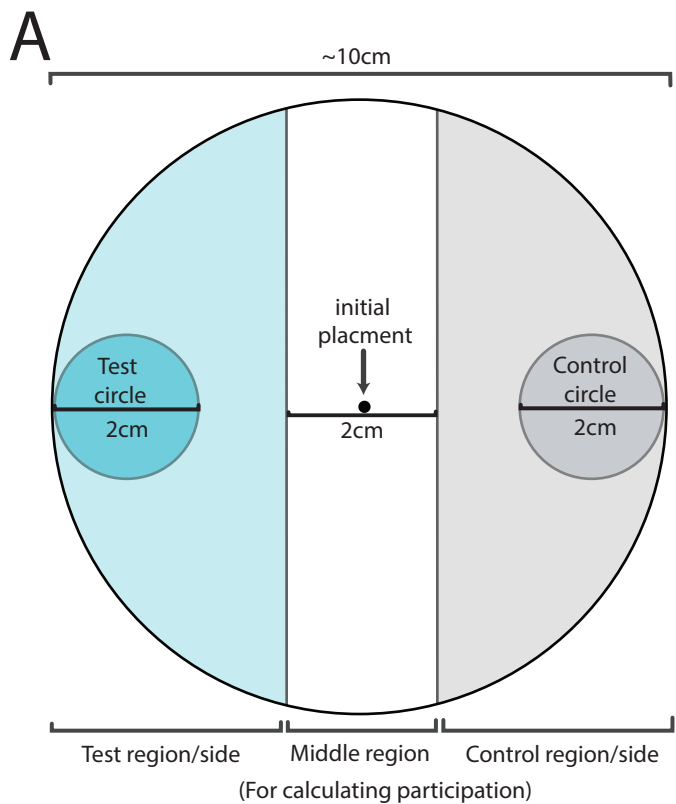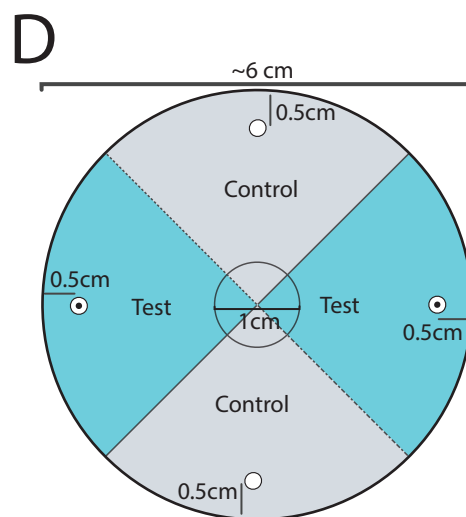

**E**

$$\text{Quadrant CI} = \frac{\# \text{ in Test quadrants} - \# \text{ in Control quadrants}}{\# \text{ in Test quadrants} + \# \text{ in Control quadrants}}$$

**B**

$$\text{Standard CI} = \frac{\# \text{ in Test circle} - \# \text{ in Control circle}}{\# \text{ in Test circle} + \# \text{ in Control circle}}$$

**C**

$$\text{Proportion of population (participation)} = \frac{\# \text{ in a specific region}}{\# \text{ in Test region} + \text{in middle region} + \# \text{ Control region}}$$
