# Supplementary material
Source: publisher figshare collection journal article supplement (https://gsajournals.figshare.com/articles/dataset/_/12616691)

**A** Natural variant response compared to loss of function mutant: *dcap-2*

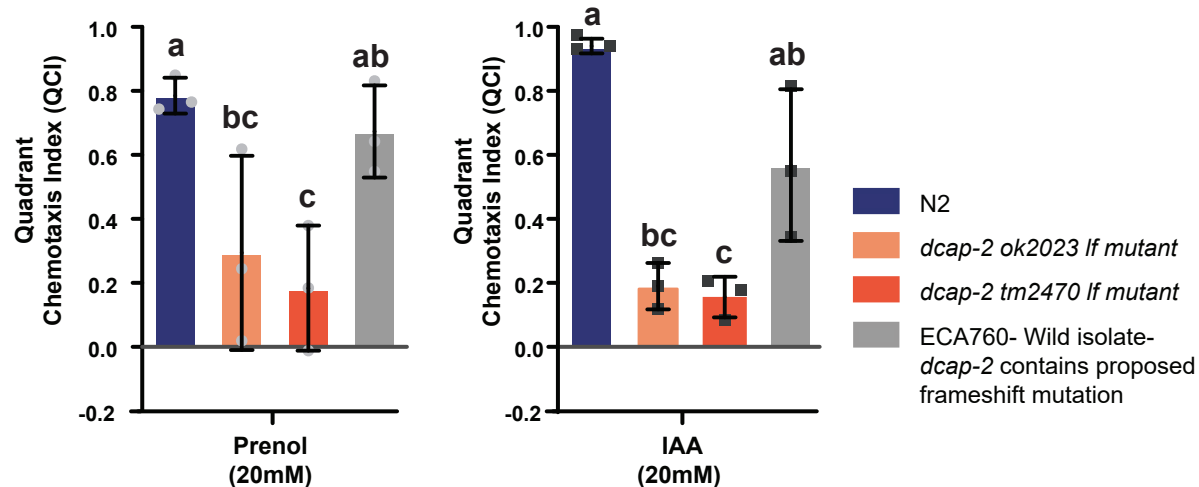

**B** Natural variant response compared to loss-of-function mutant: *cllec-39* (20mM prenol only)

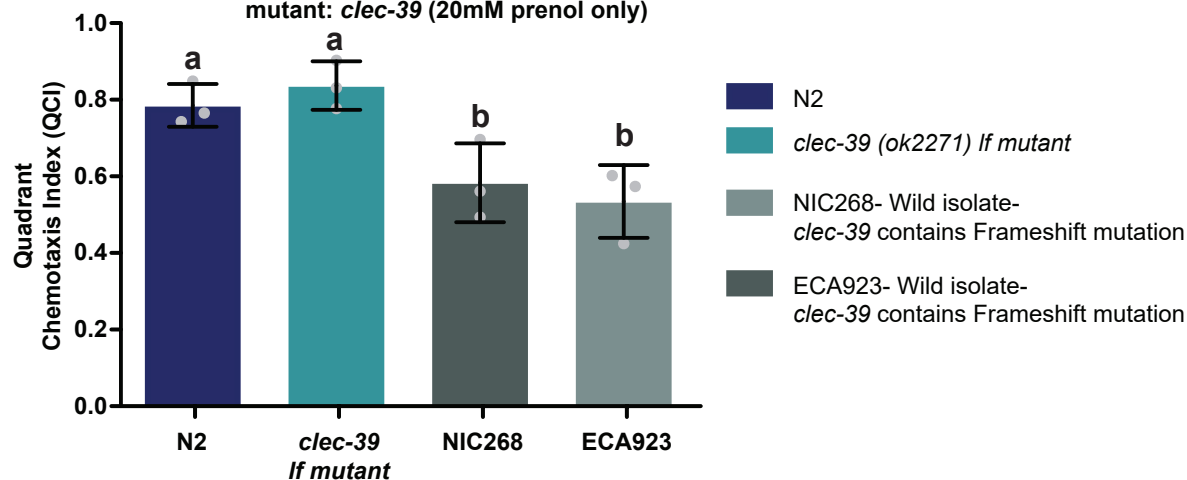

**C** Natural variant response compared to loss of function mutant: *dod-17*

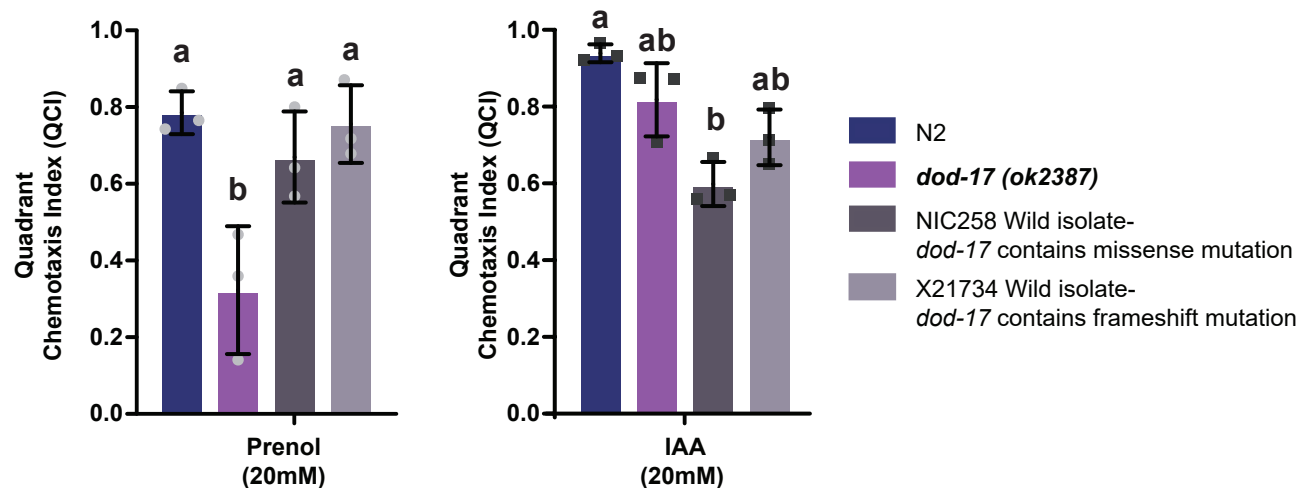

Supplement: Supplementary file 5 [file 1]
