# Supplementary material
Source: publisher figshare collection journal article supplement (https://gsajournals.figshare.com/articles/dataset/_/12616691)
Supplement: Supplementary file 10 [file 1]

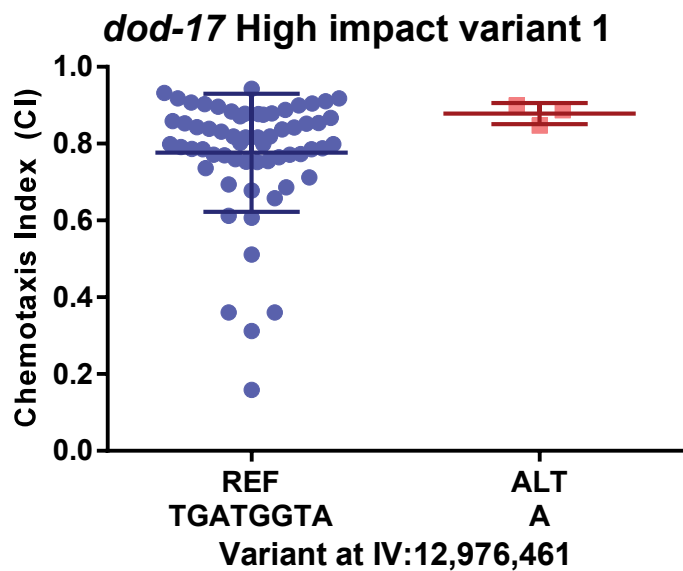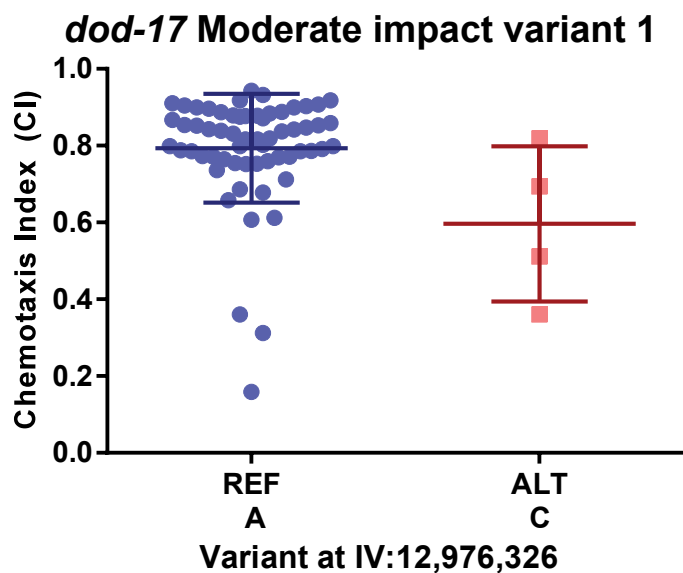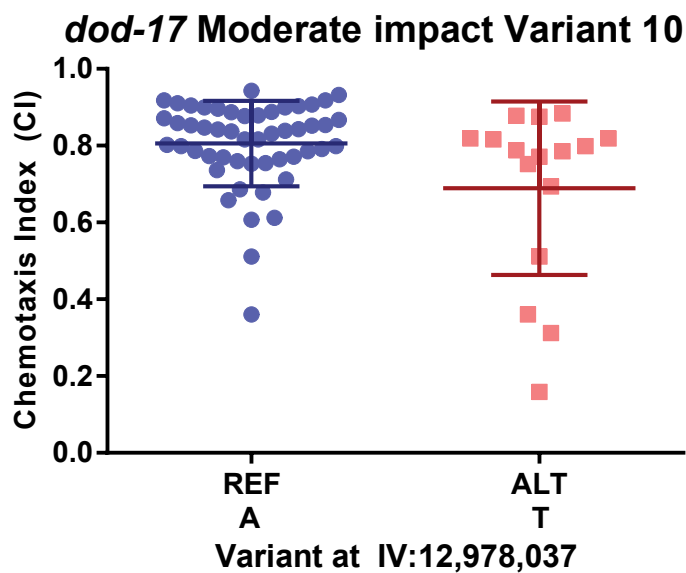

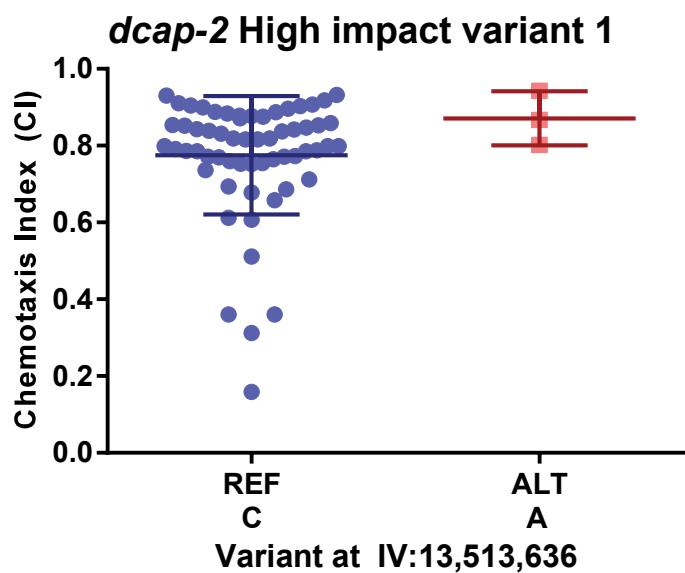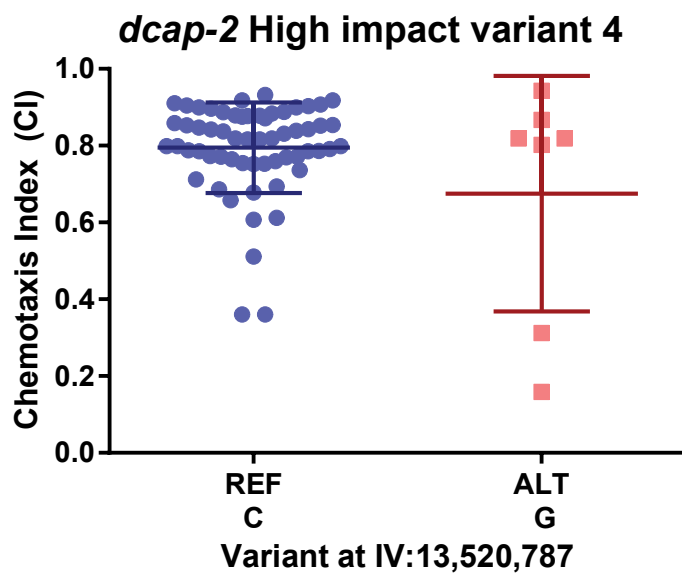

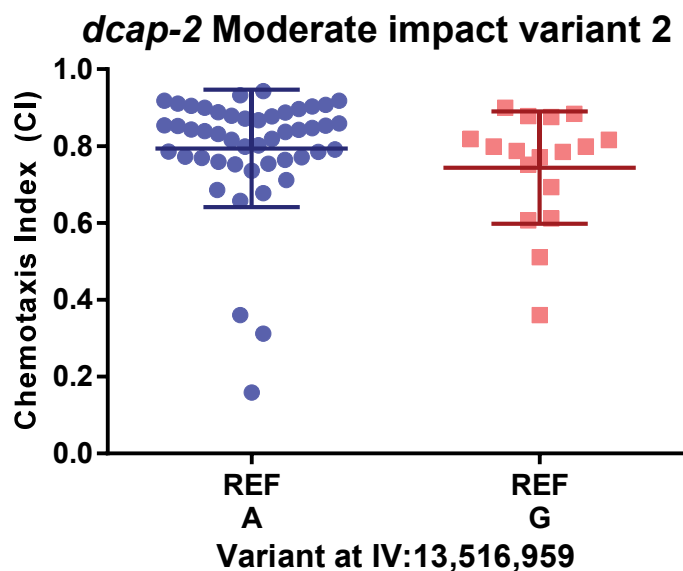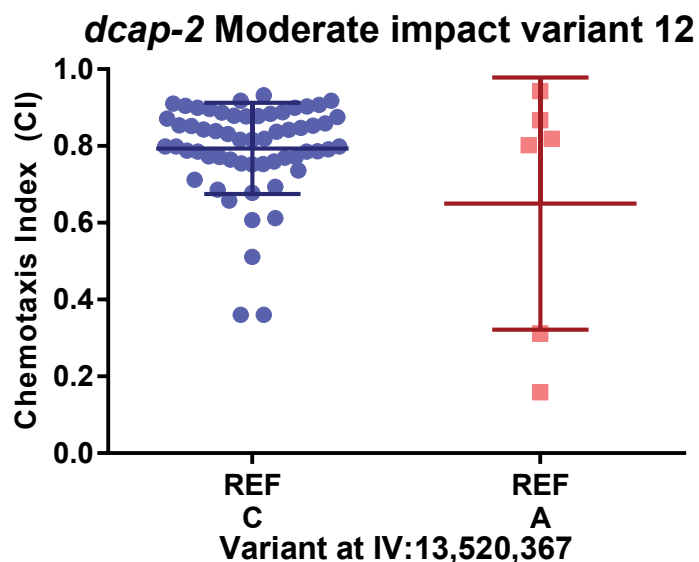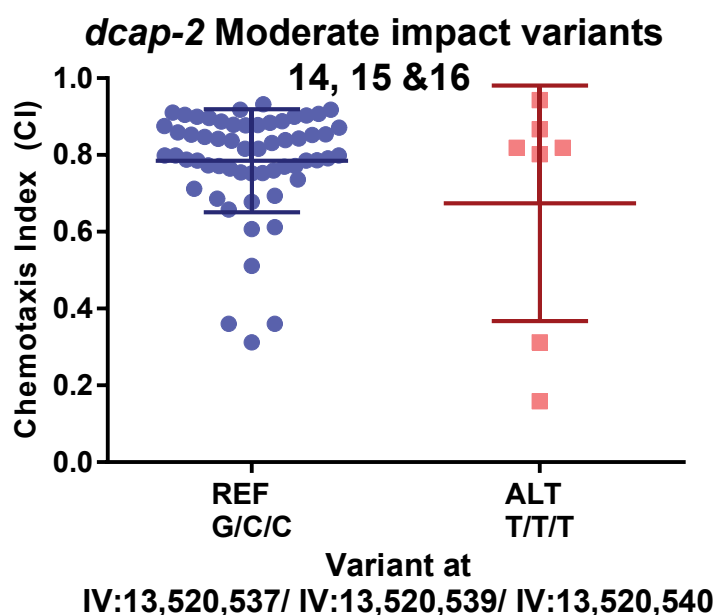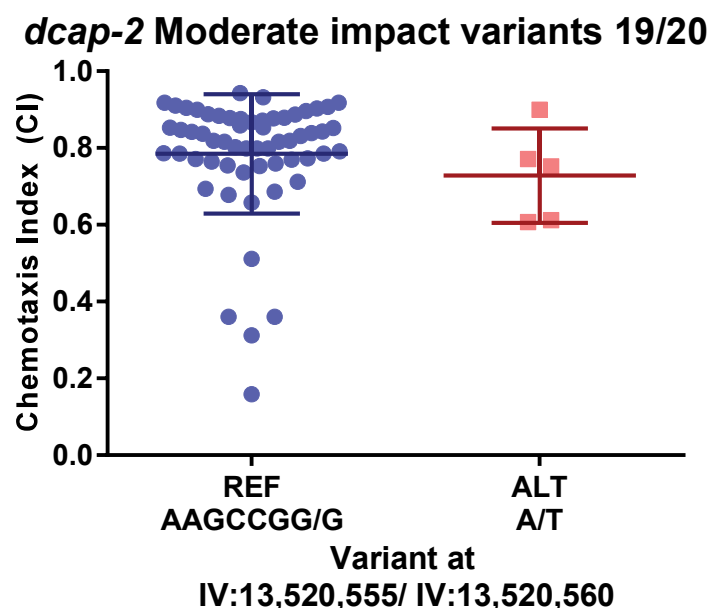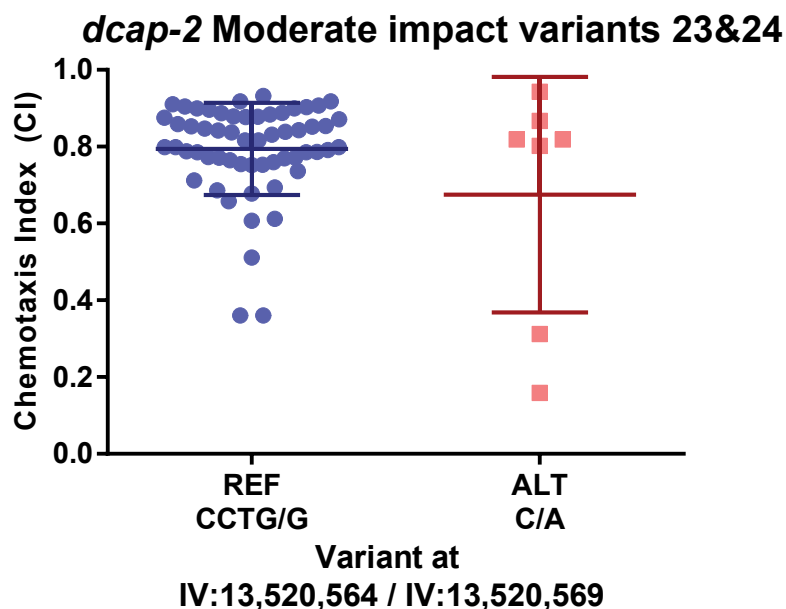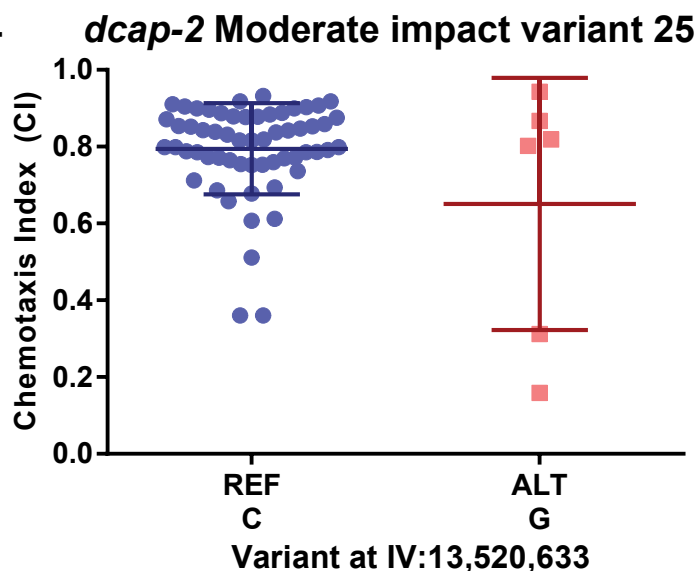

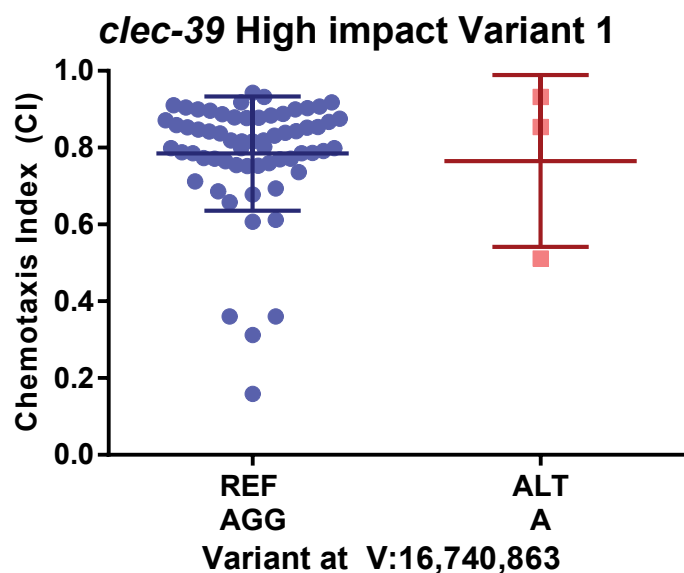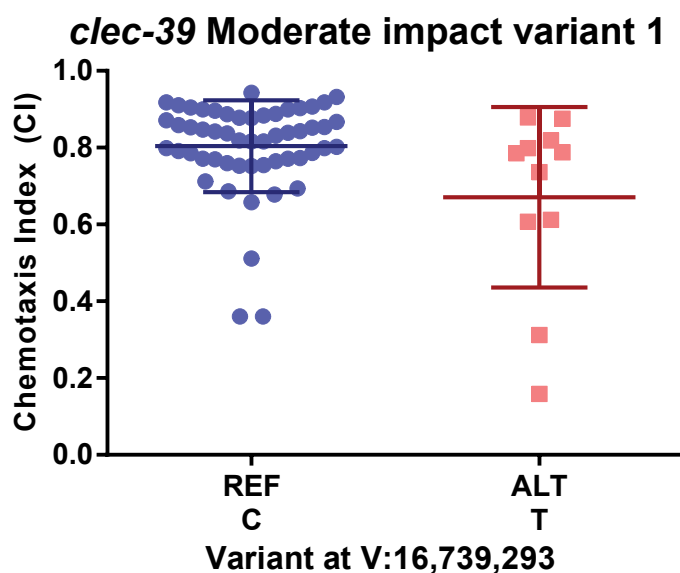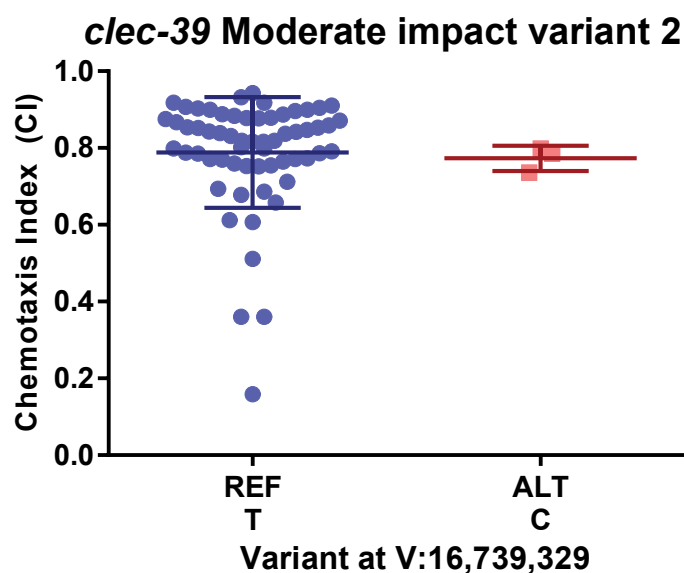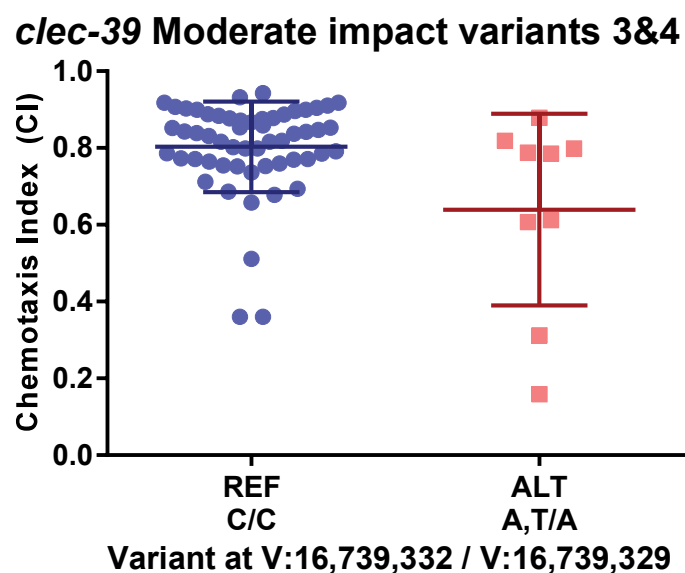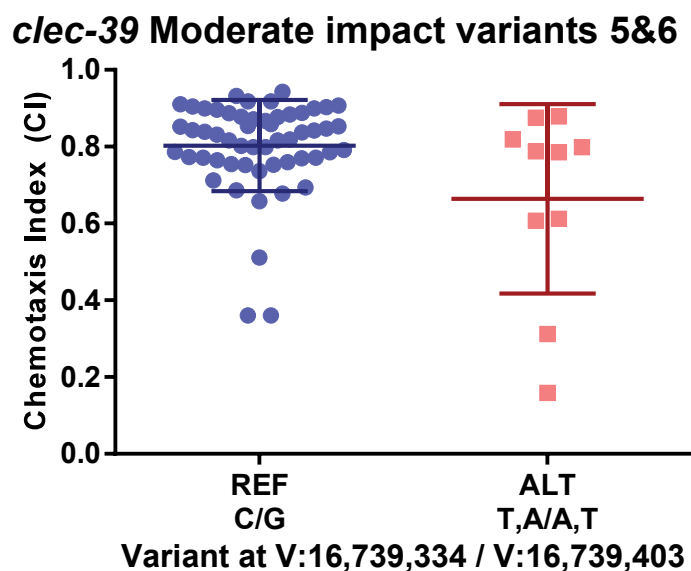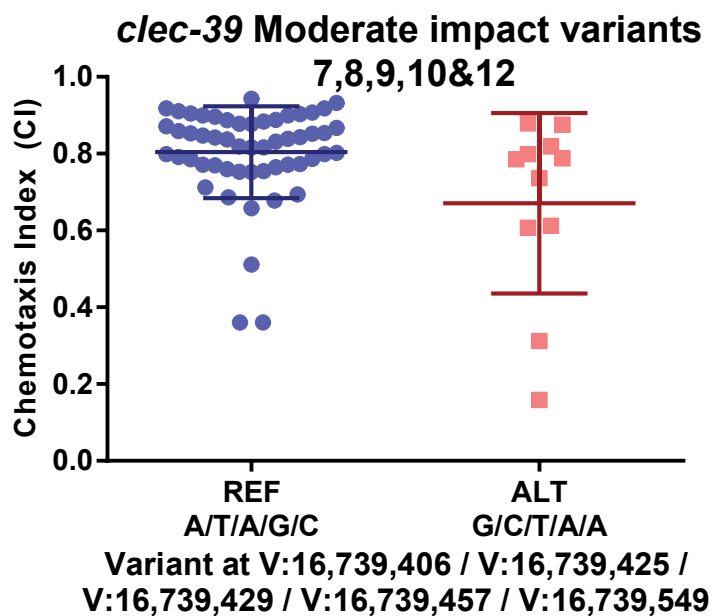



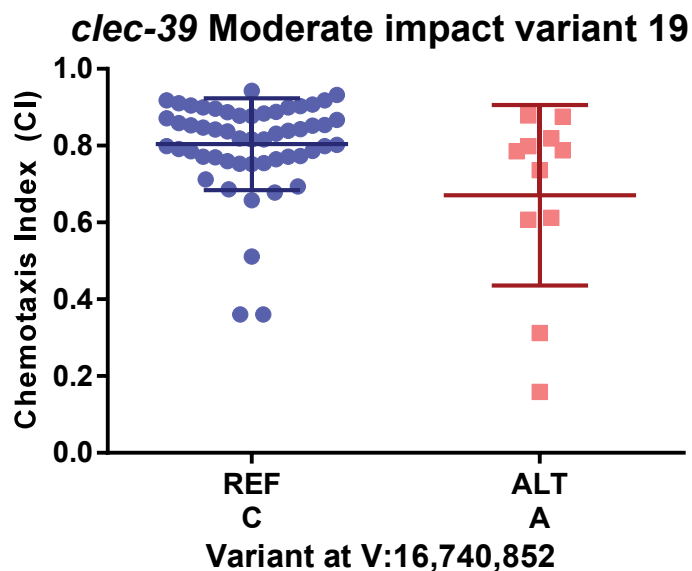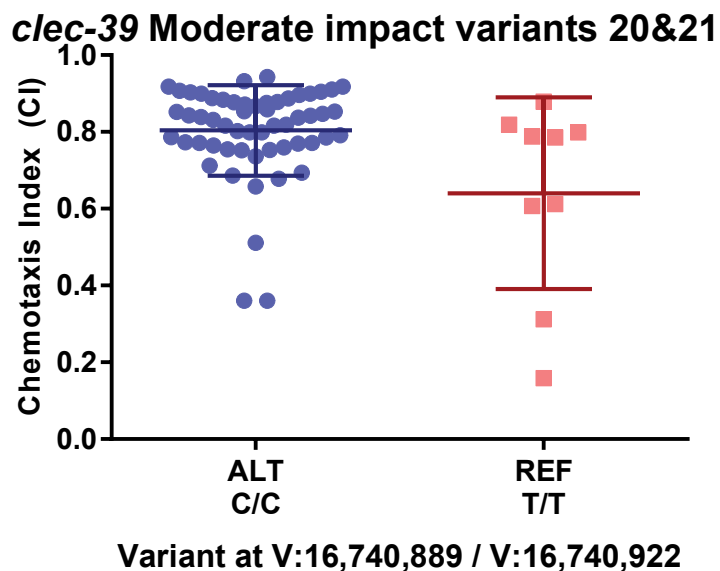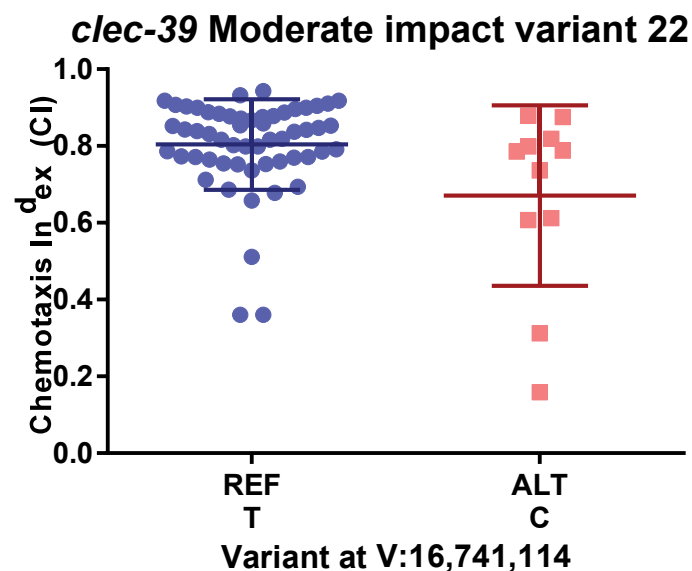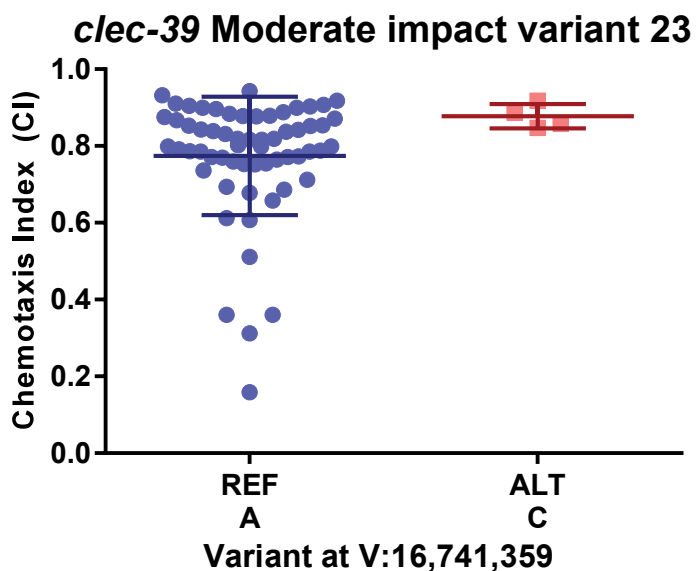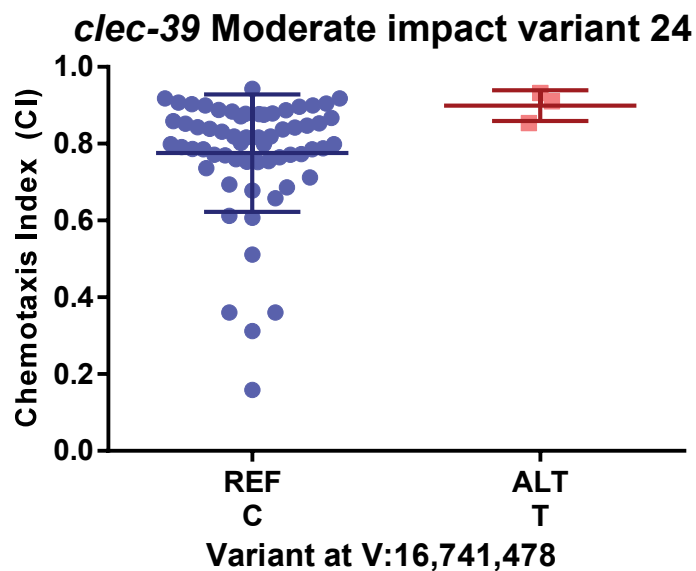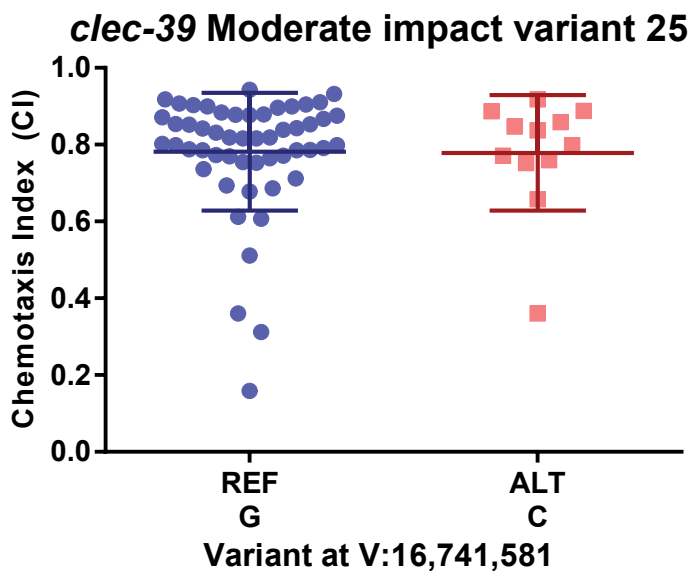

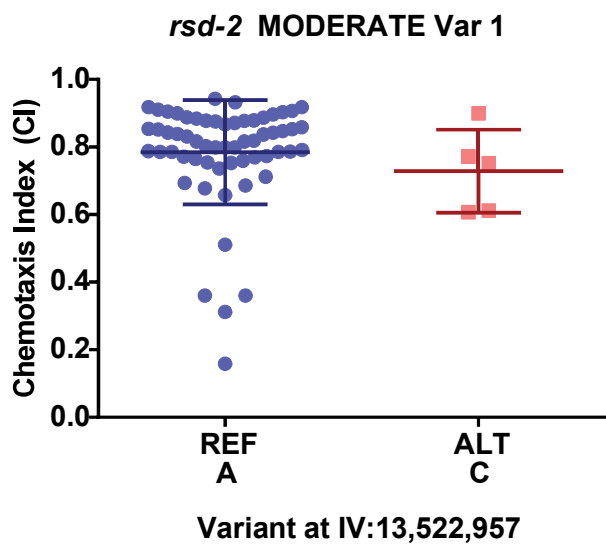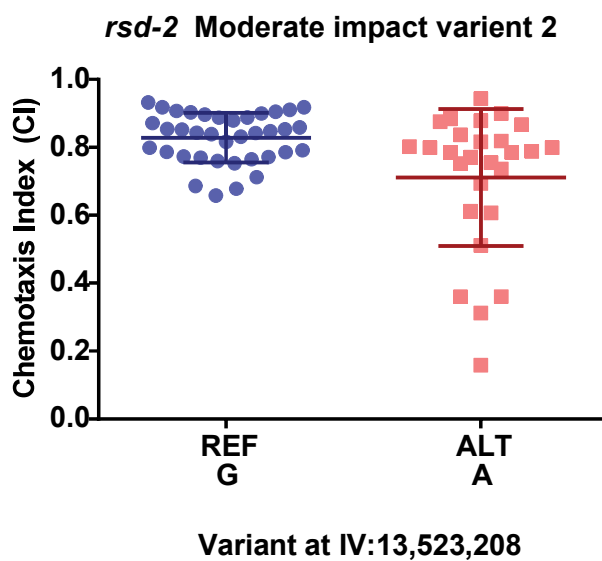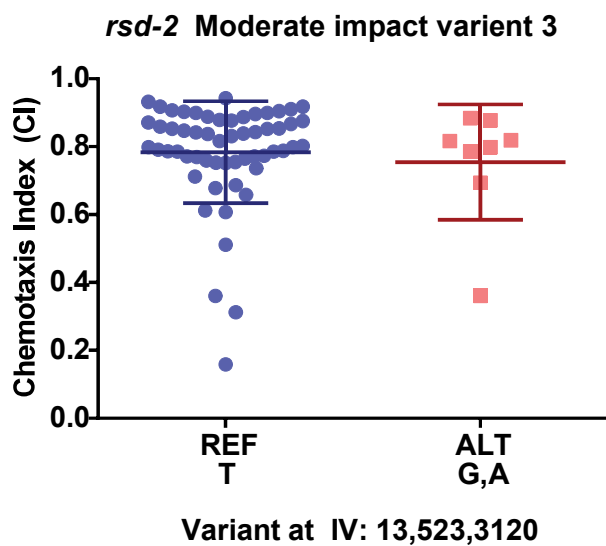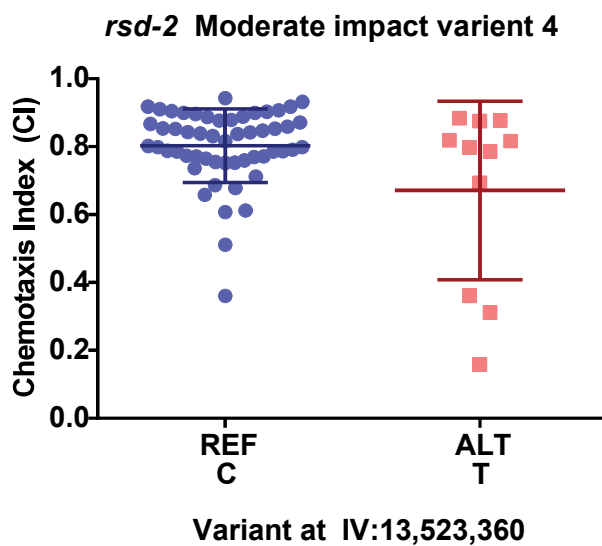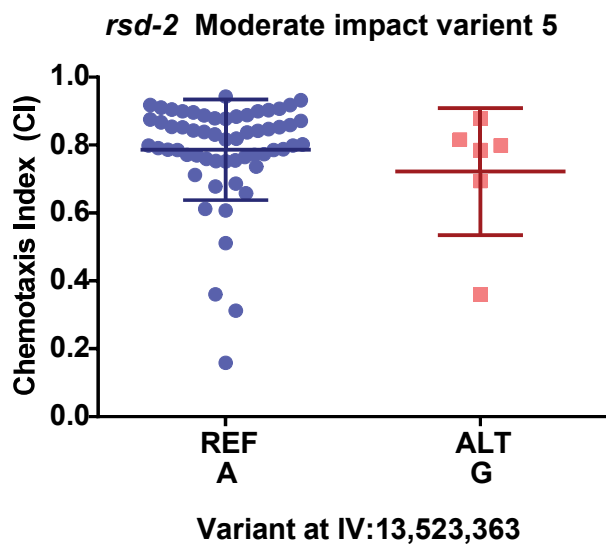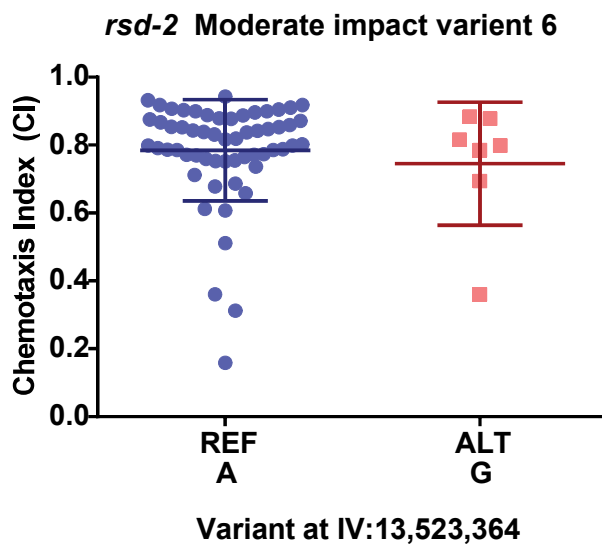

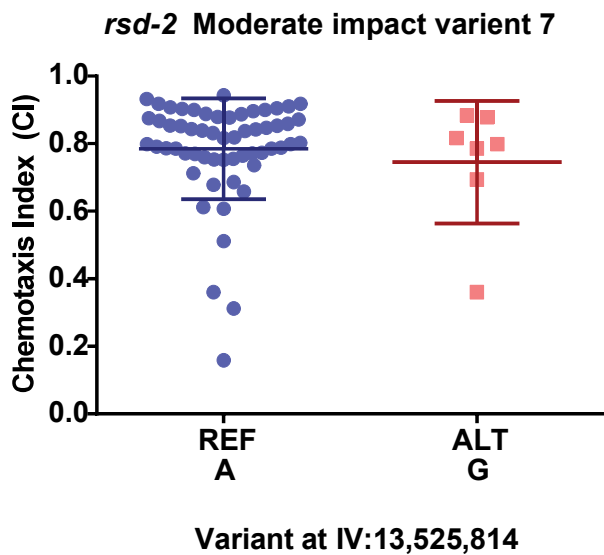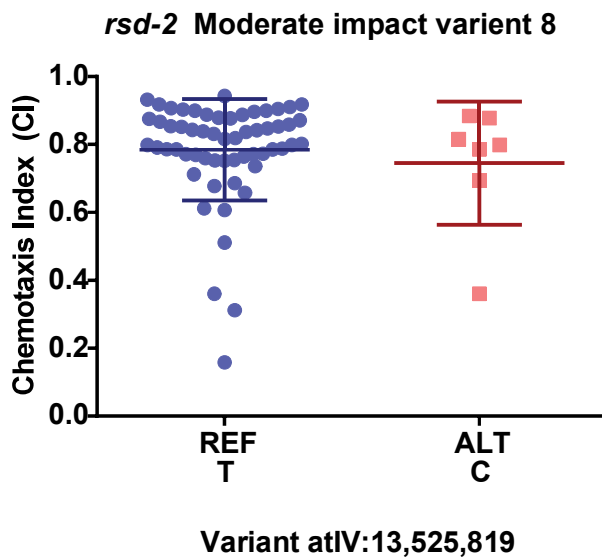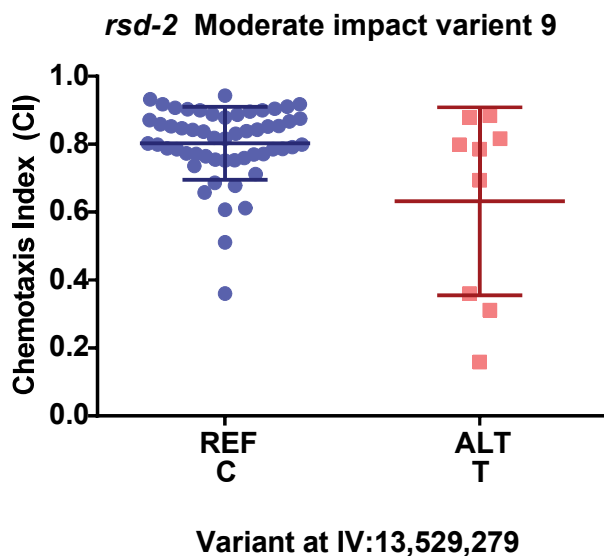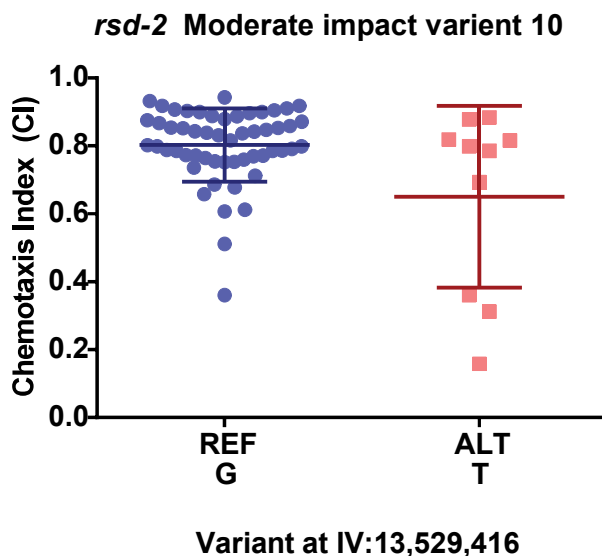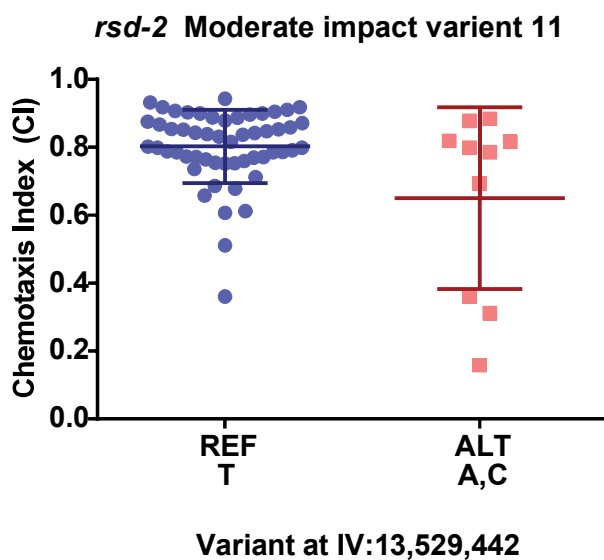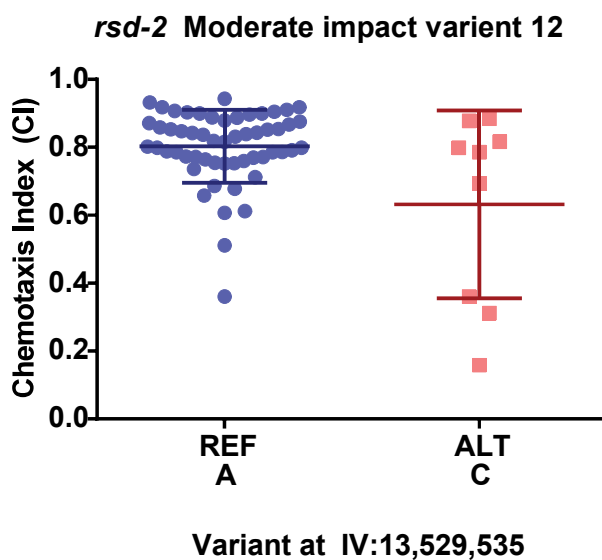



*rsd-2* Moderate impact variant 13

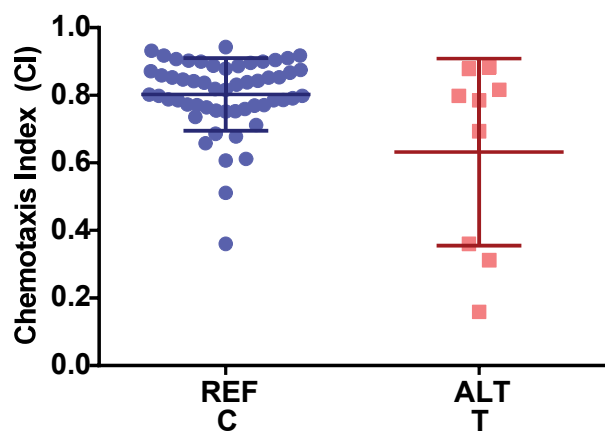

Variant at IV:13,529,539

*rsd-2* Moderate impact variant 14

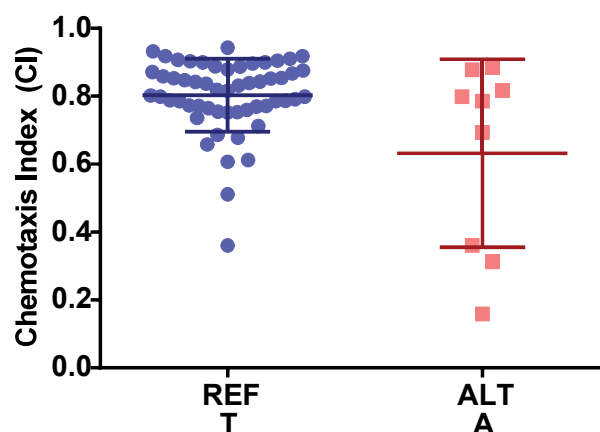

Variant at IV:13,529,545

*rsd-2* Moderate impact variant 15

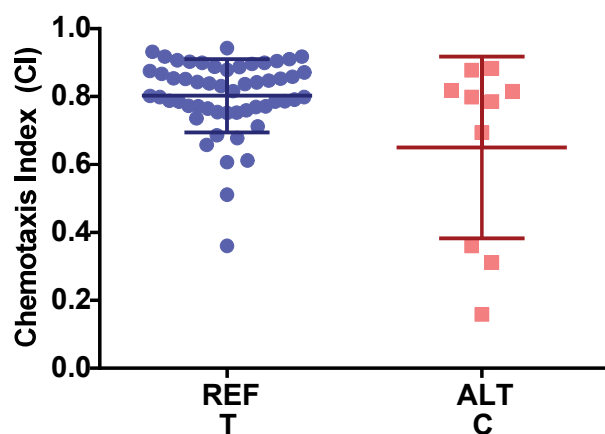

Variant at IV:13,529,645

*rsd-2* Moderate impact variant 16

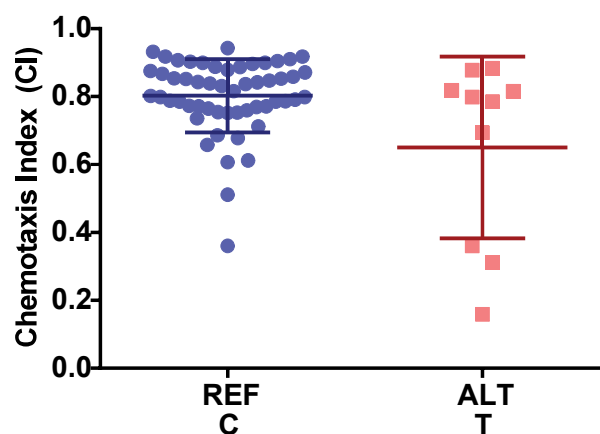

Variant at IV:13,529,646

*rsd-2* Moderate impact variant 17

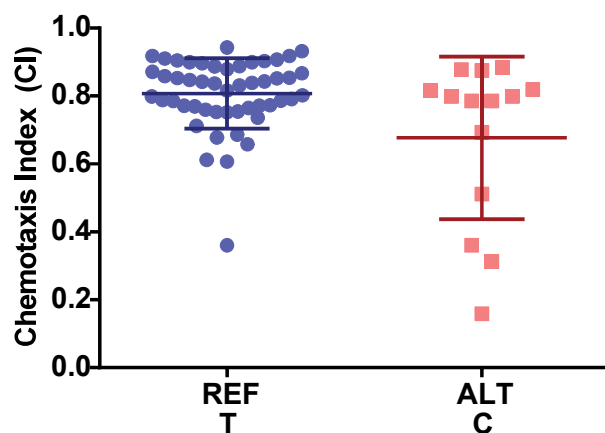

Variant at IV:13,529,712

*rsd-2* Moderate impact variant 18

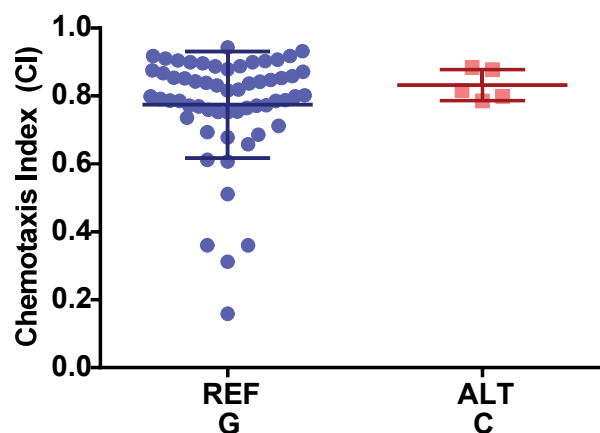

Variant at IV:13,529,756

***rsd-2* Moderate impact variant 19**

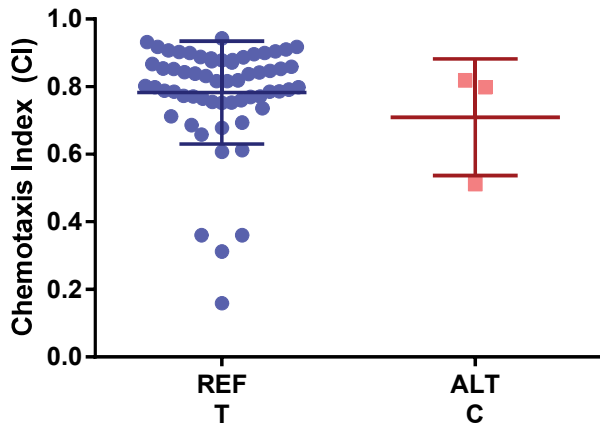

Variant at IV:13,530,731

***rsd-2* Moderate impact variant 20**

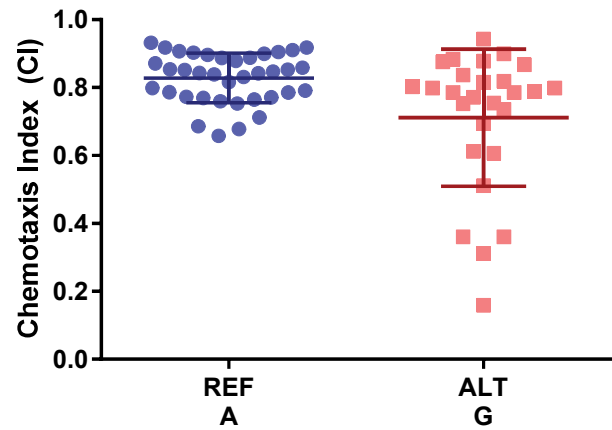

Variant at IV:13,531,685

***rsd-2* Moderate impact variant 21**

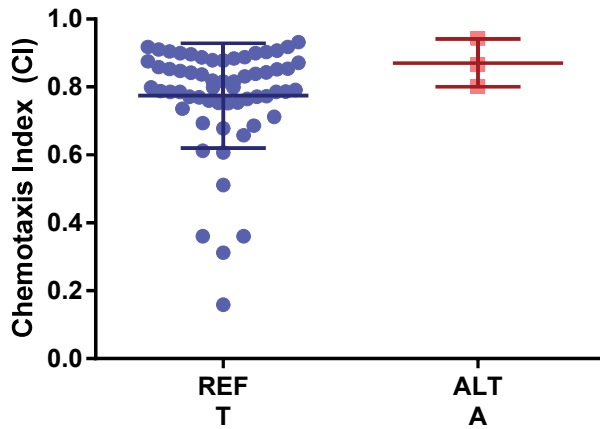

Variant at IV:13,532,814

***rsd-2* Moderate impact variant 22**

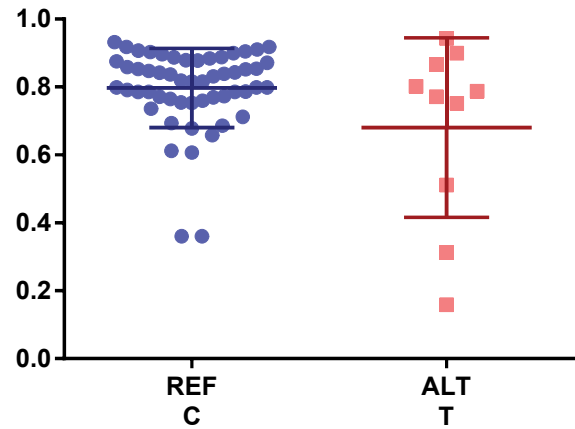

Variant at IV:13,534,421

***rsd-2* Moderate impact variant 23**

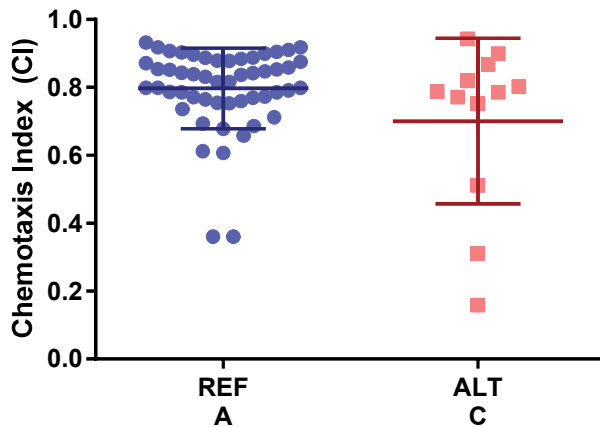

Variant at IV:13,534,434
