# Supplementary material
Source: publisher figshare collection journal article supplement (https://gsajournals.figshare.com/articles/dataset/_/12616691)

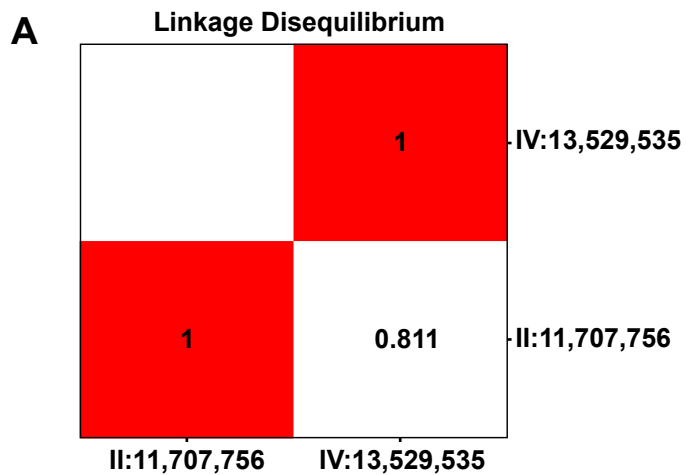

$$r = \frac{-D}{\sqrt{p(A) * p(a) * p(B) * p(b)}}$$

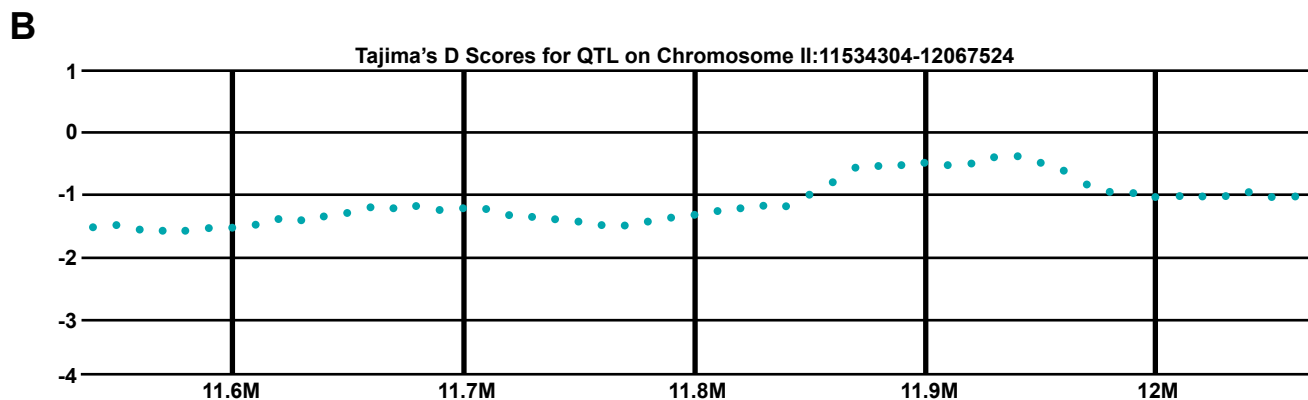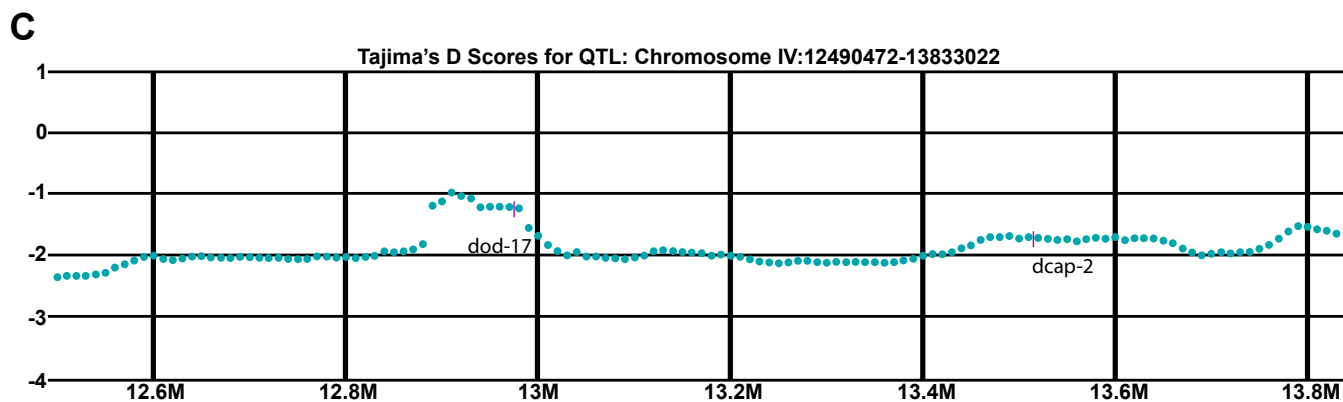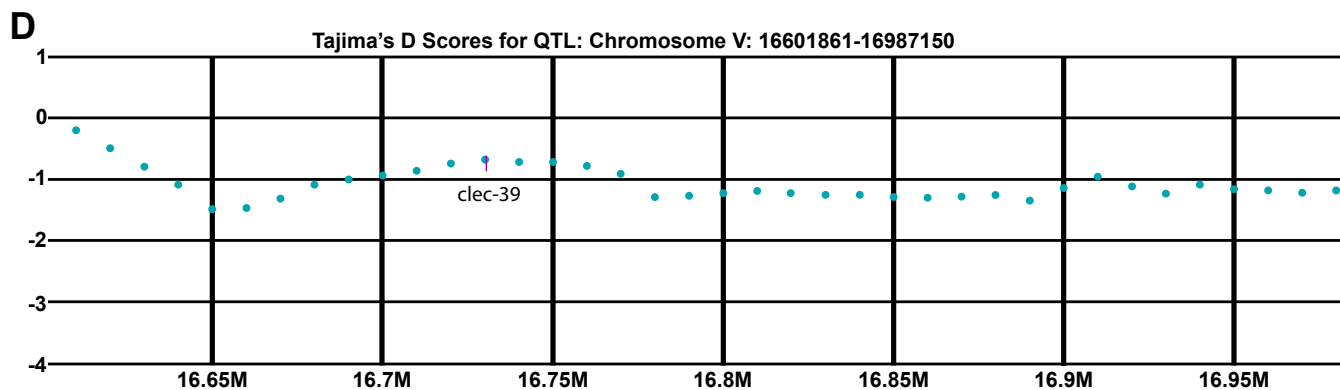

Supplement: Supplementary file 1 [file 1]

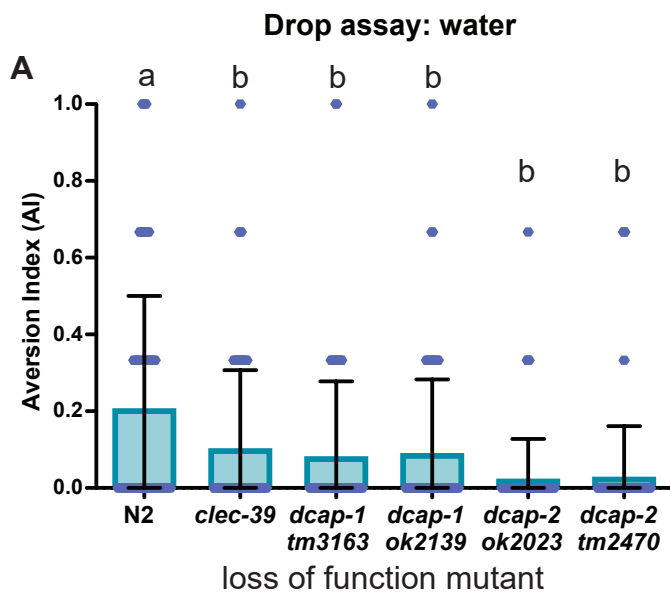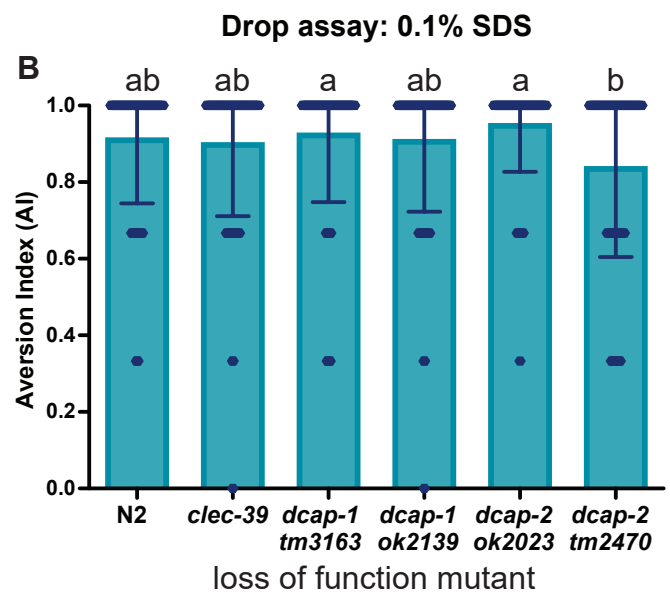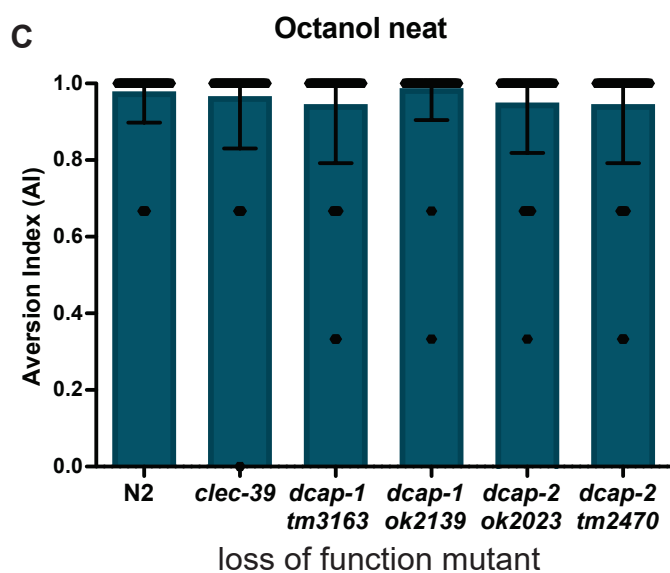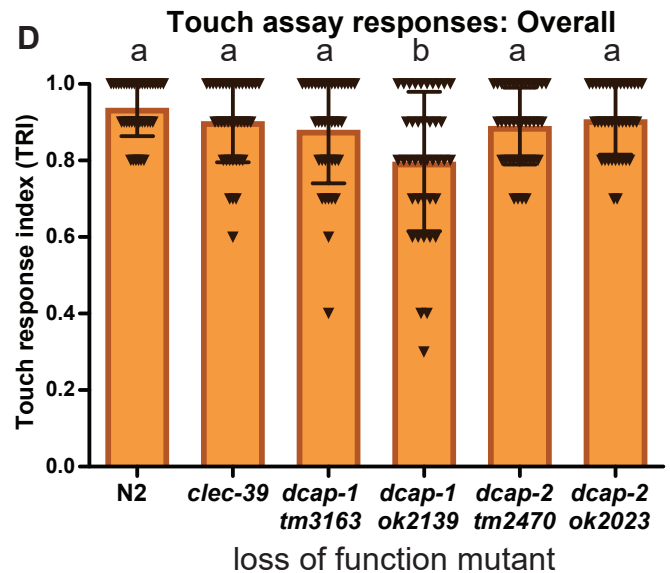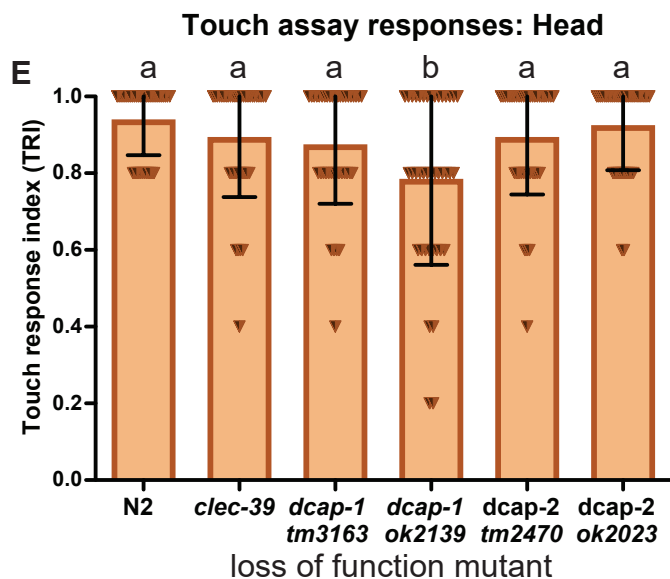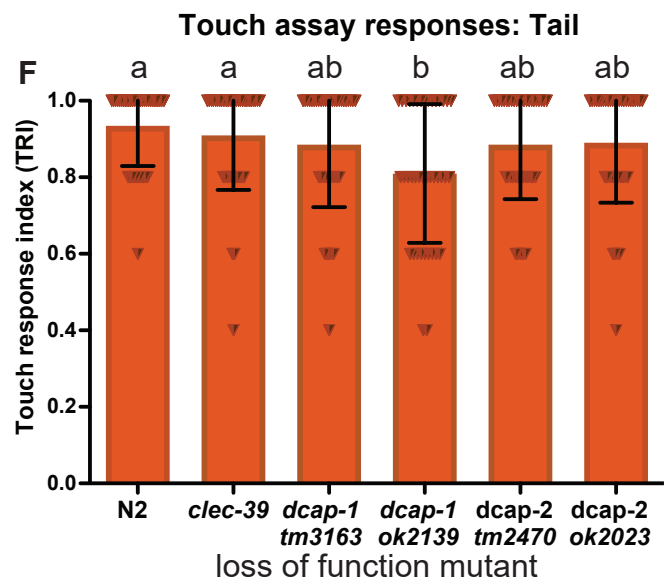

Supplement: Supplementary file 2 [file 1]

## Response of all *lf* mutants (all alleles) to 20mM prenil

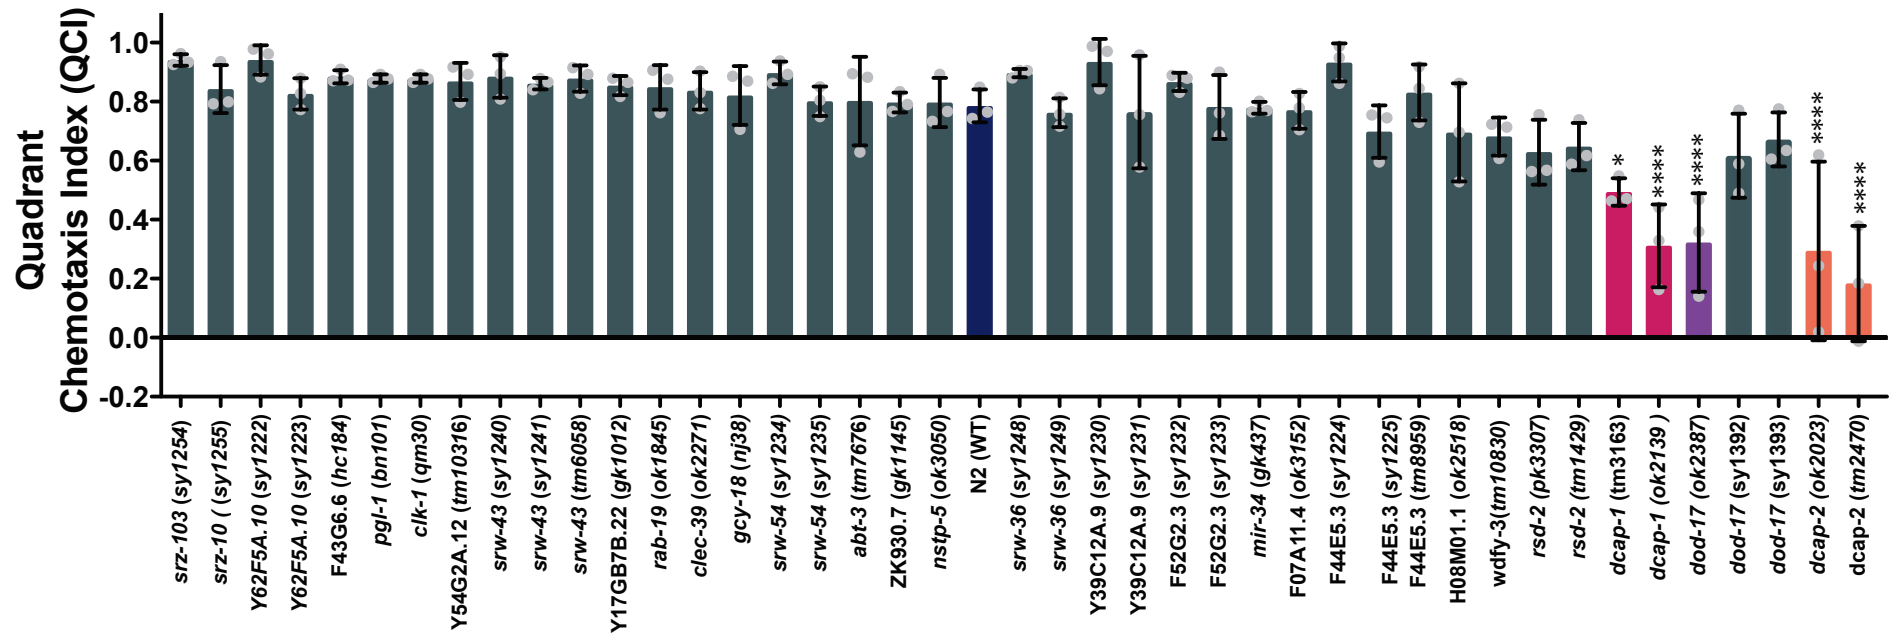

Supplement: Supplementary file 4 [file 1]

Comparison of *C. elegans* and  
free-living species: *Pristionchus pacificus*

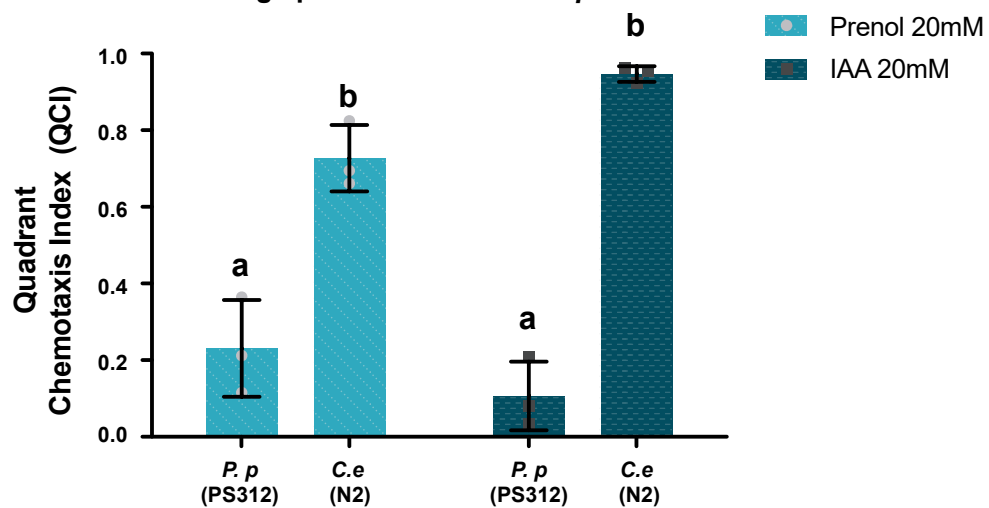

Supplement: Supplementary file 6 [file 1]

Comparison of *dod-17* *lf* mutants  
to 20mM IAA or prenol

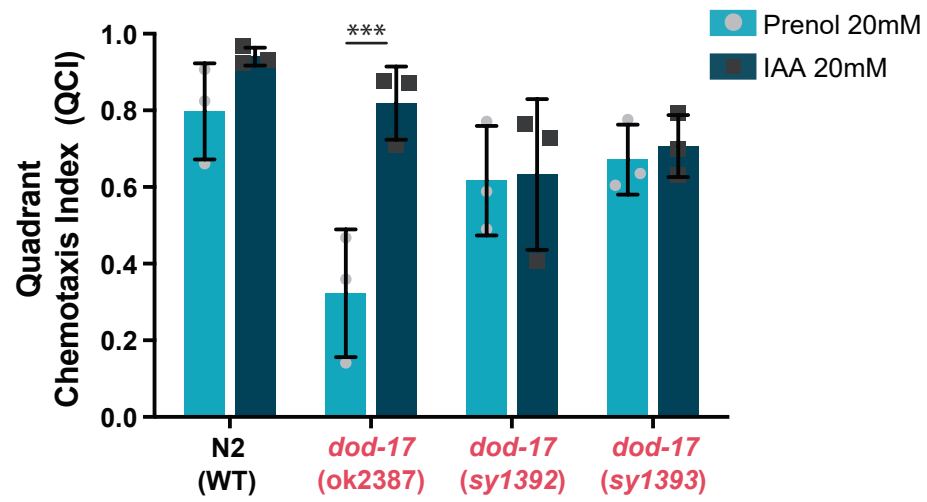

Supplement: Supplementary file 7 [file 1]

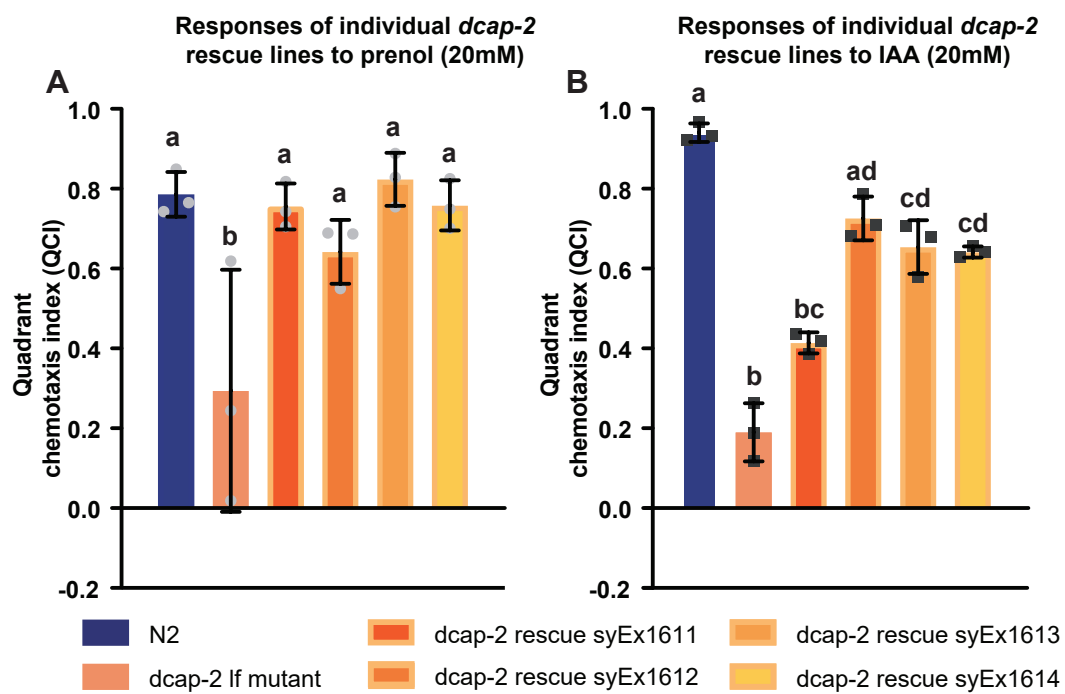

Supplement: Supplementary file 8 [file 1]

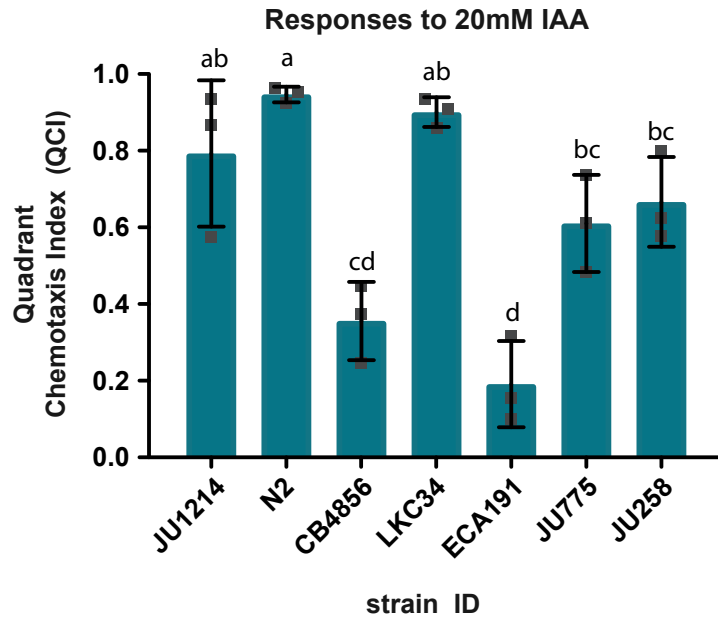

Supplement: Supplementary file 9 [file 1]

Response of Divergent Set Strains to 20mM Prenol

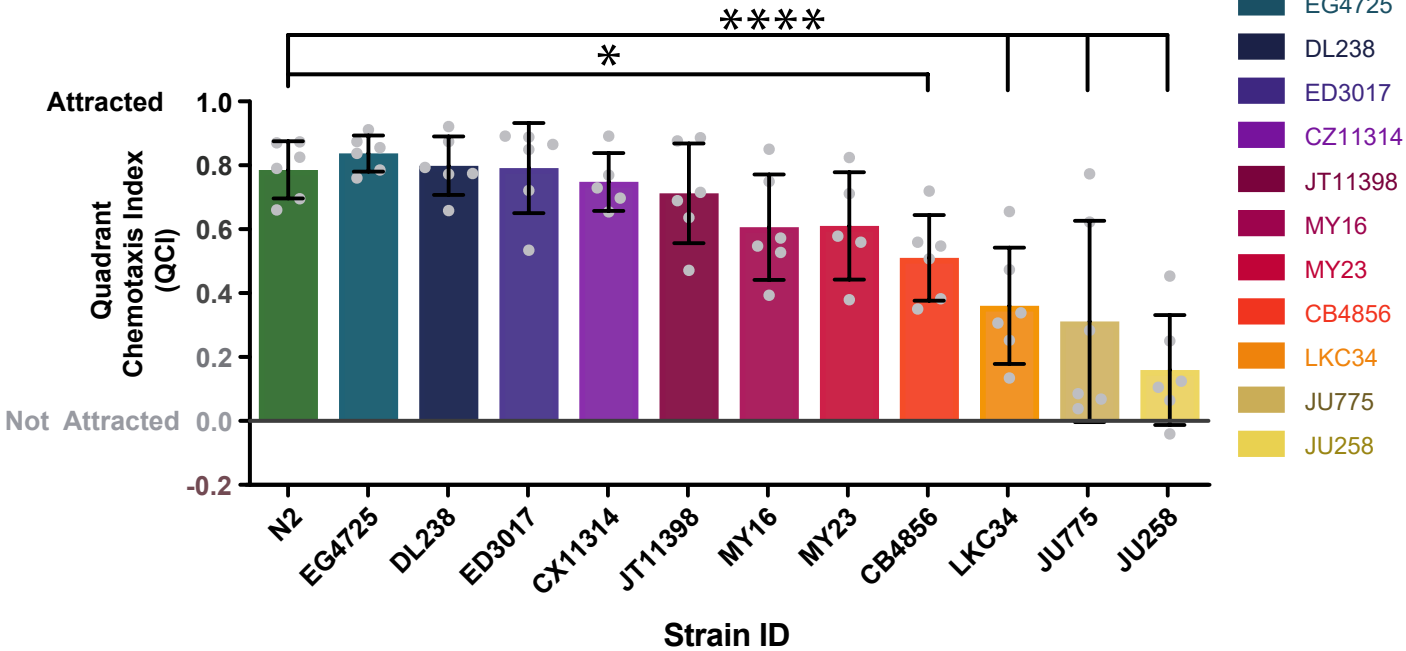

Supplement: Supplementary file 11 [file 1]

***rsd-2* loss of function alleles  
responses to prenol (20mM) and IAA (20mM)**

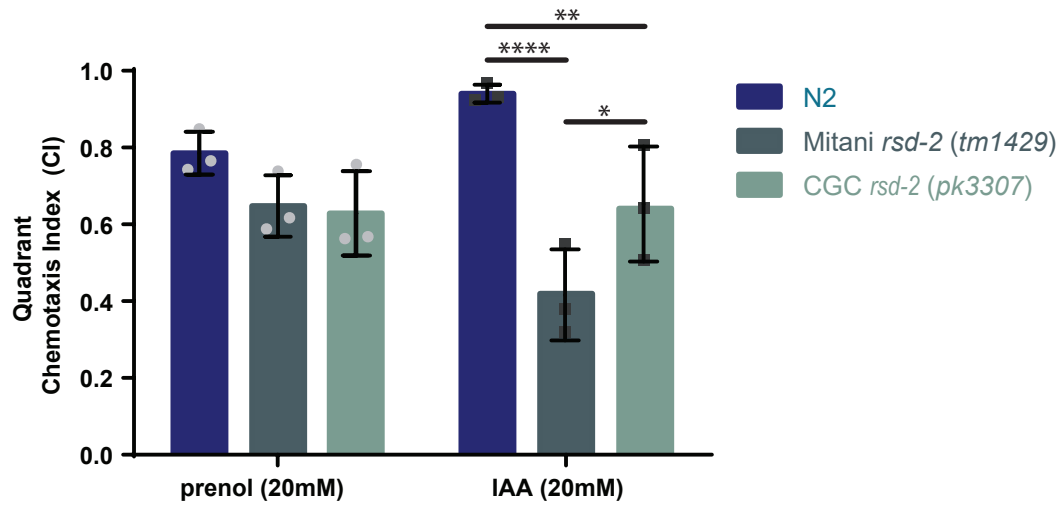

Supplement: Supplementary file 12 [file 1]

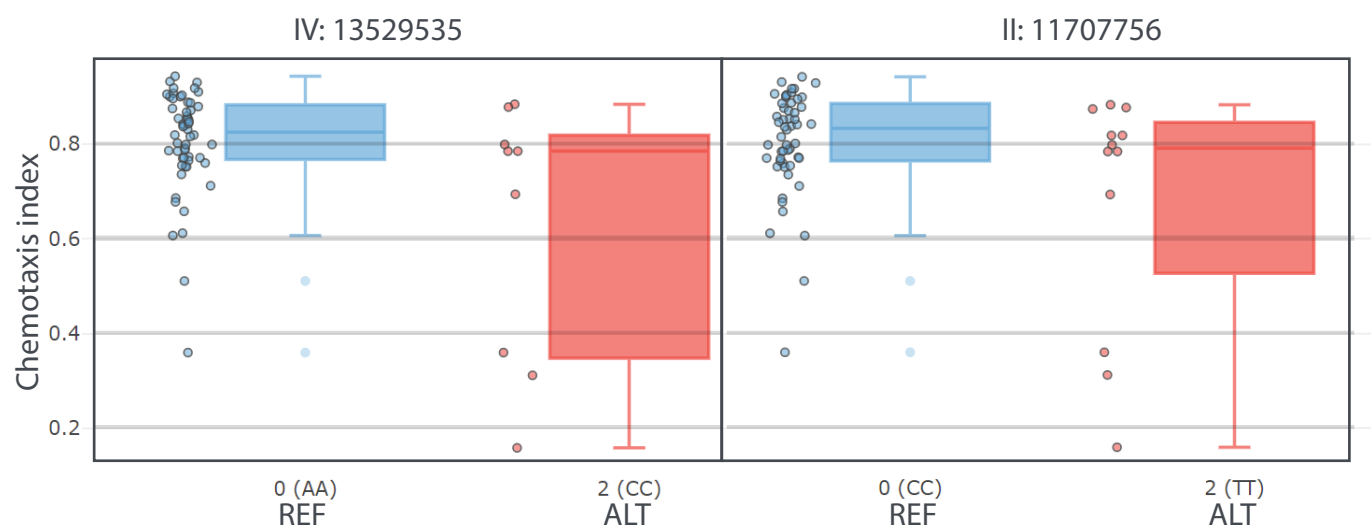

Supplement: Supplementary file 13 [file 1]

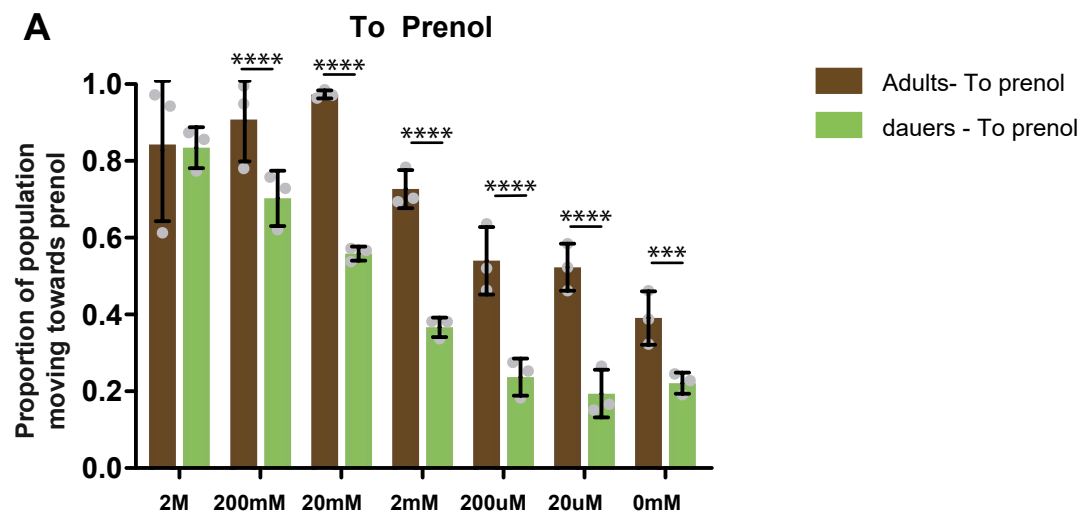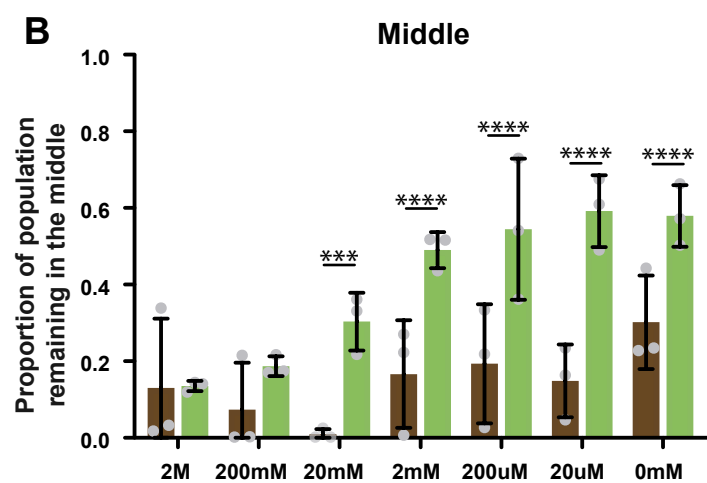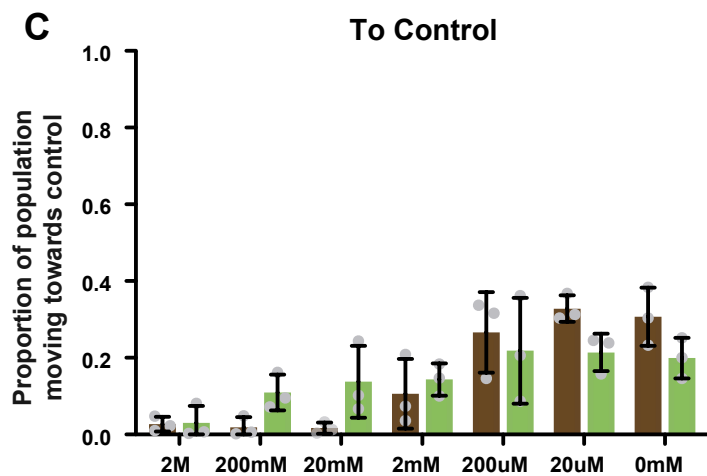

Supplement: Supplementary file 14 [file 1]

Mapping results from 57 strains (Divergent set & 45 mapping set strains)

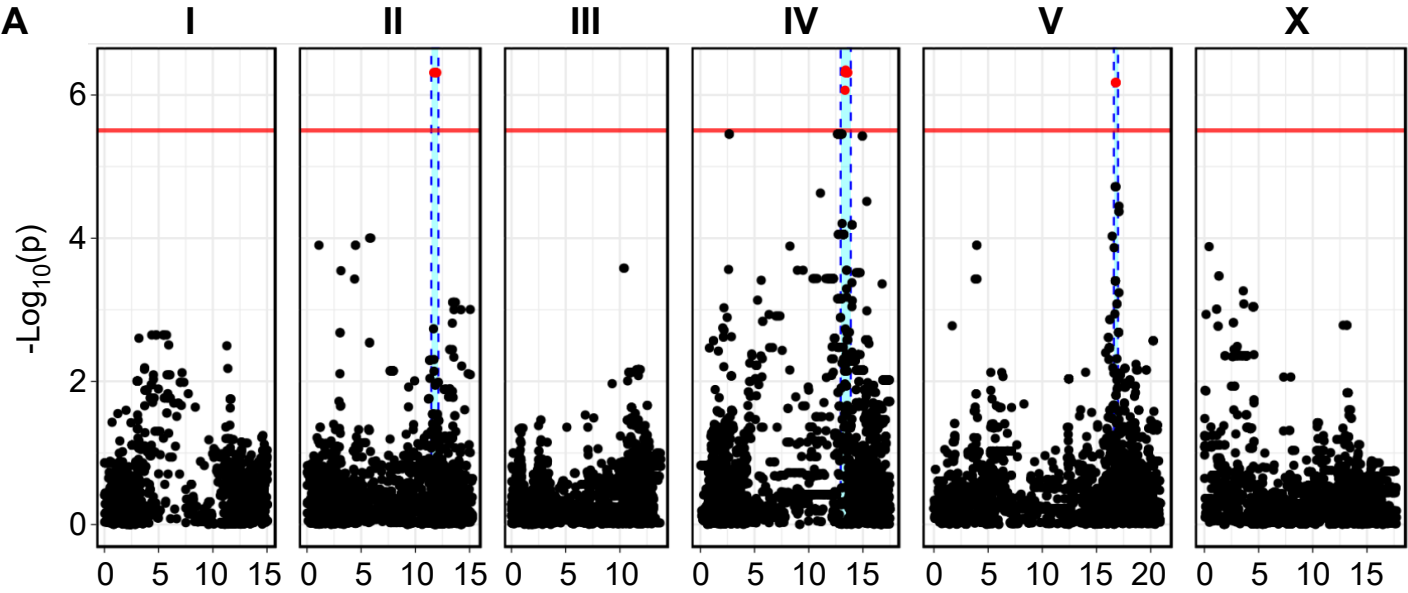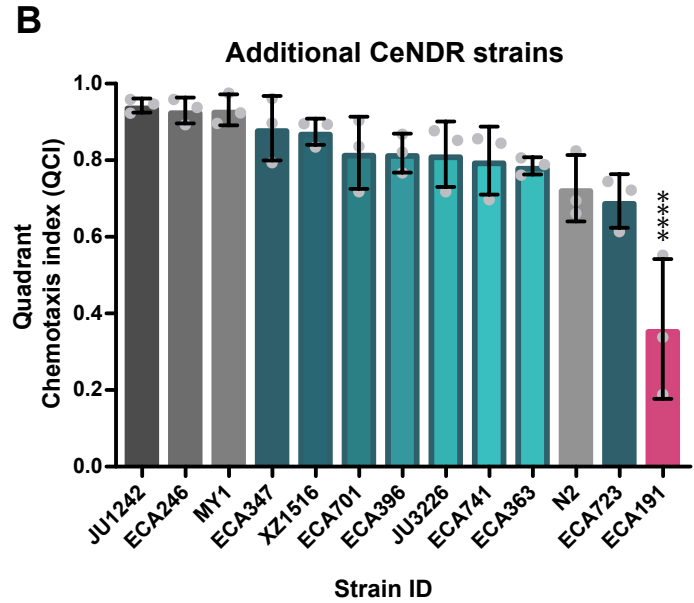

Supplement: Supplementary file 15 [file 1]
